# Supplementary material for: Synthesis and crystal structure of nitrosoruthenium complexes cis-[Ru(NO)Py2Cl2(OH)] and cis-[Ru(NO)Py2Cl2(H2O)]Cl. Photoinduced transformations of cis-[Ru(NO)Py2Cl2(OH)]
Source: Royal Society of Chemistry journal article supplement (doi:10.1039/c6nj02425d), 2016-01-01
Supplement: c6nj02425d1.pdf [file c6nj02425d1.pdf]

**Electronic supplementary information**

**DOI:**

**Title:** Synthesis and crystal structure of nitrosoruthenium complexes *cis*-[Ru(NO)Py<sub>2</sub>Cl<sub>2</sub>(OH)] and *cis*-[Ru(NO)Py<sub>2</sub>Cl<sub>2</sub>(H<sub>2</sub>O)]Cl. Photoinduced transformations of *cis*-[Ru(NO)Py<sub>2</sub>Cl<sub>2</sub>(OH)]

**Author(s):** Alexander N. Makhinya,\* Maxim A. Il'in, Ruslan D. Yamaletdinov, Il'ya V. Korolkov, Iraida A. Baidina

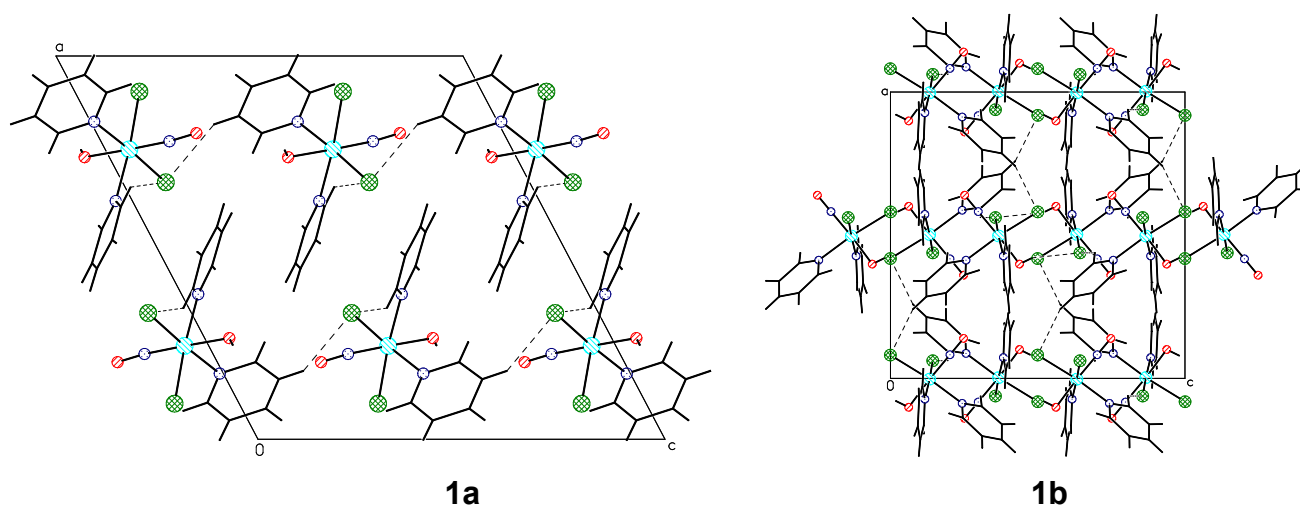

**Figure S1.** Packing of structural units in the crystals of **1a** and **1b** as viewed along the axis *y*.

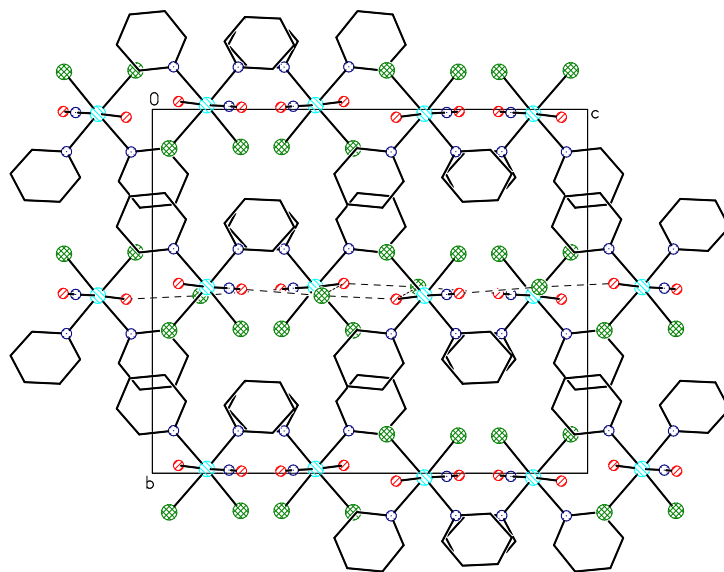

**Figure S2.** Packing of structural units in the crystal of **2** as viewed along the axis *x*.

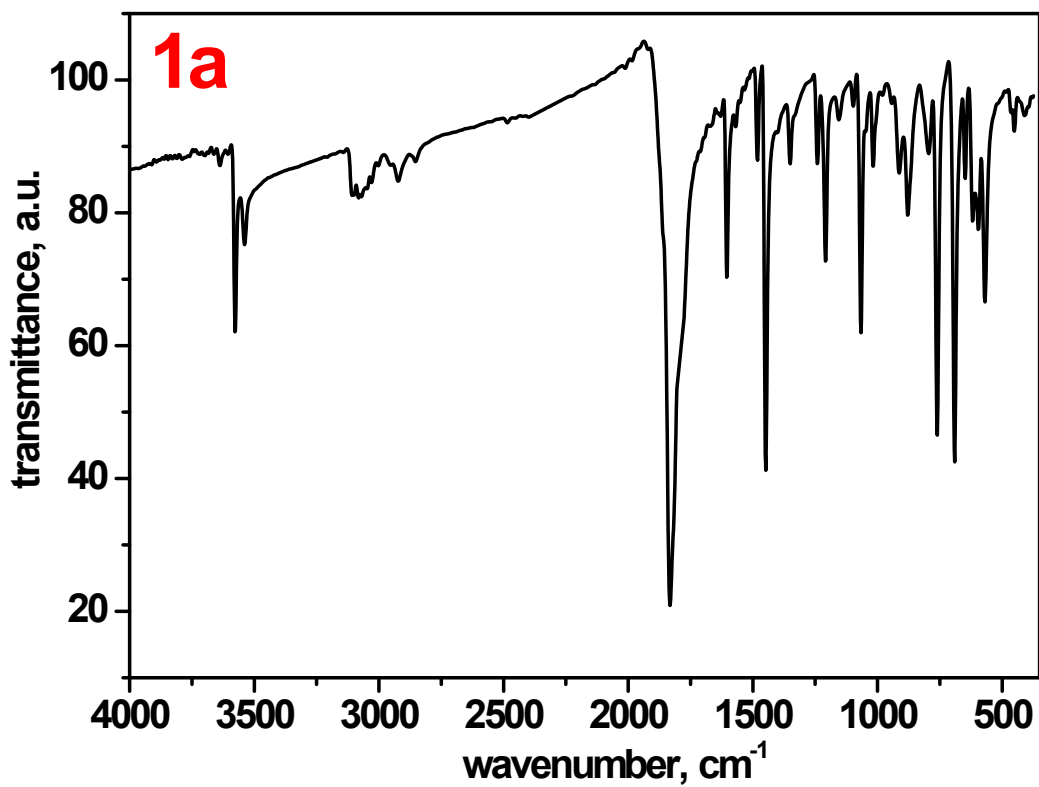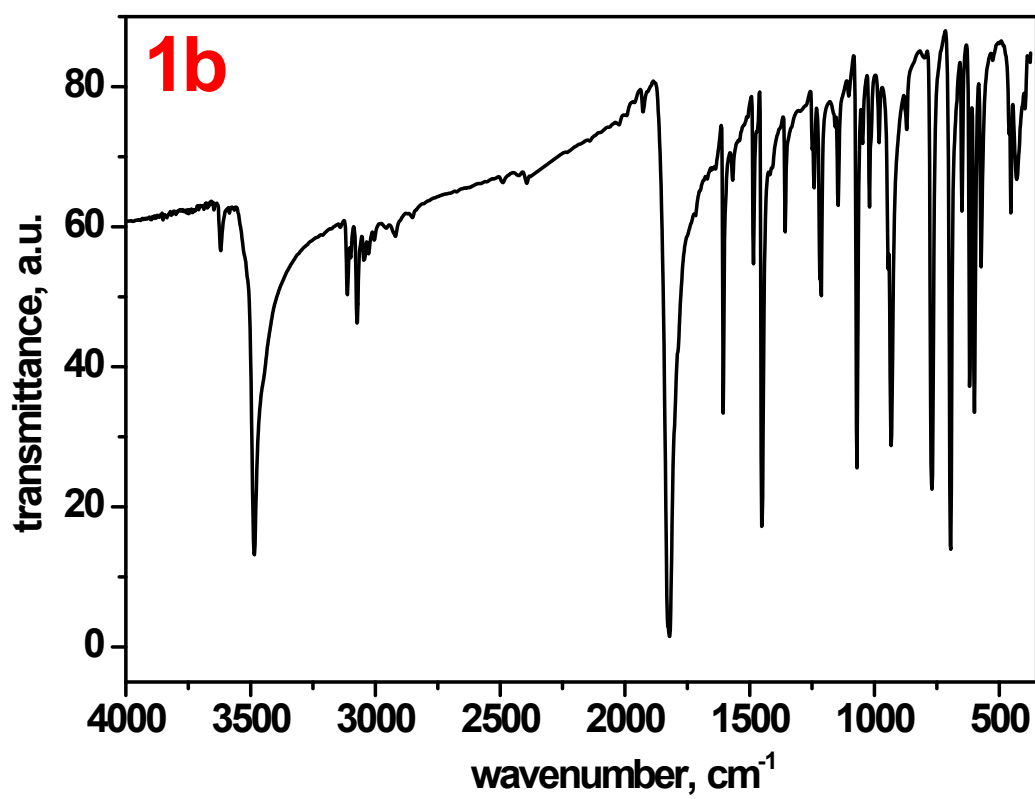

Figure S3. Infrared spectra of 1a and 1b.

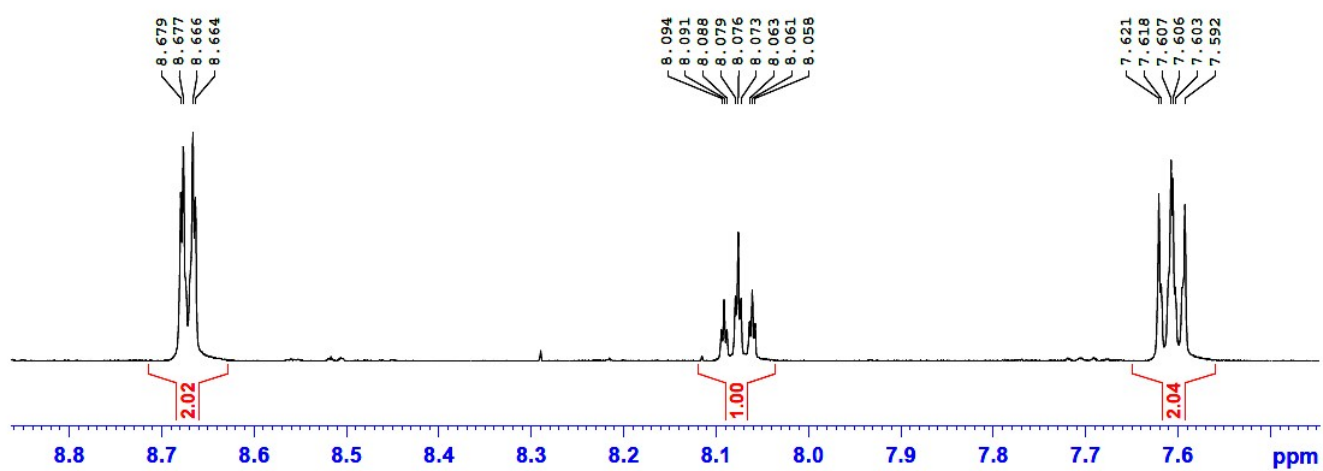

**Figure S4.** NMR  $^1\text{H}$  spectrum of *cis*-[Ru(NO)Py<sub>2</sub>Cl<sub>2</sub>(OH)] (1a or 1b) in DMSO.

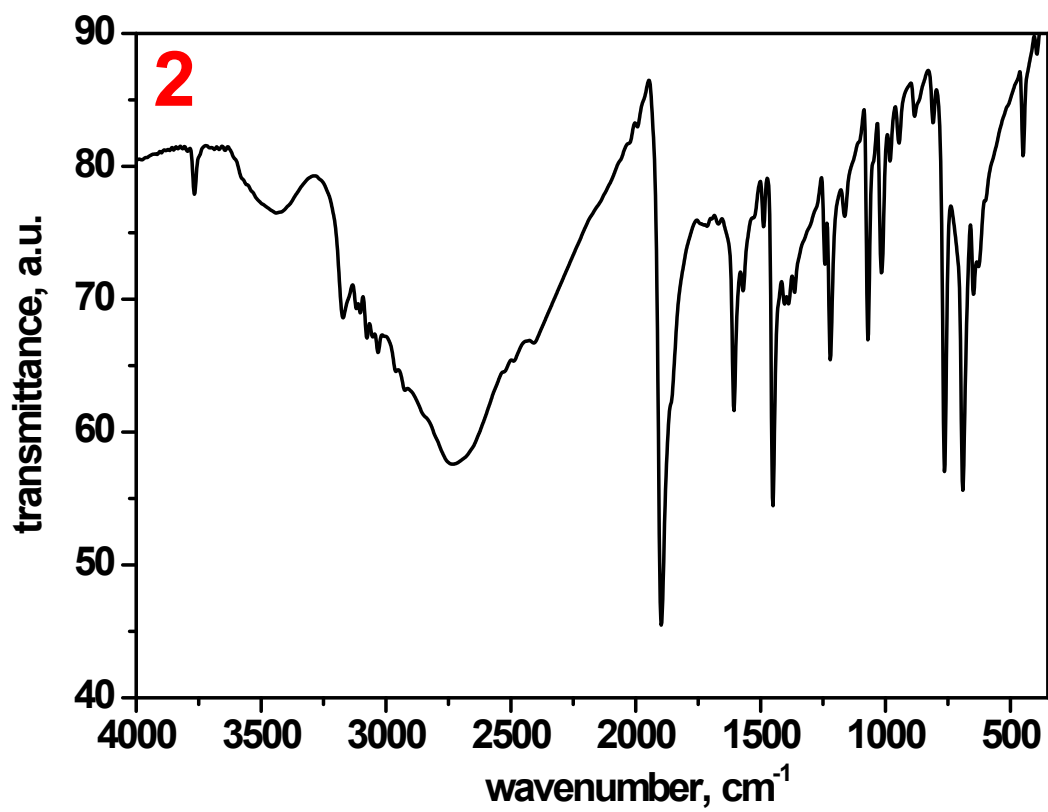

Figure S5. Infrared spectrum of *cis*-[Ru(NO)Py<sub>2</sub>Cl<sub>2</sub>(H<sub>2</sub>O)]Cl (**2**).

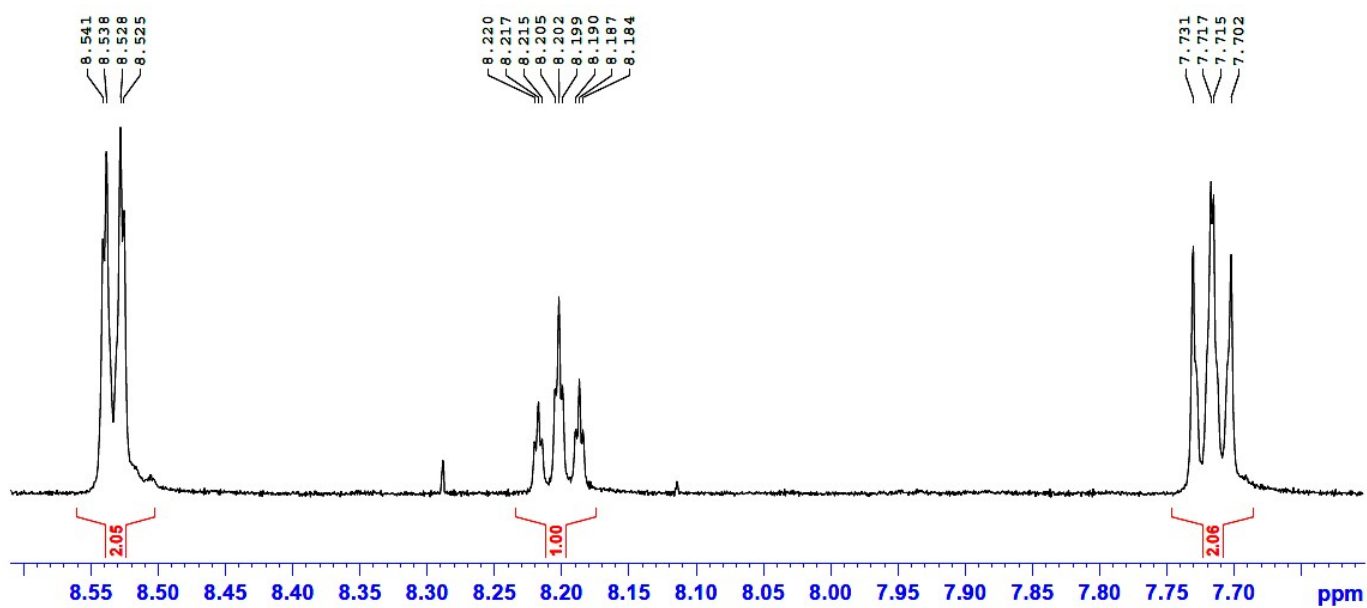

**Figure S6.** NMR  $^1\text{H}$  spectrum of *cis*-[Ru(NO)Py<sub>2</sub>Cl<sub>2</sub>(H<sub>2</sub>O)]Cl (**2**) in DMSO.

**Table S1.** Optimized geometries of different states for *cis*-[Ru(NO)Py<sub>2</sub>Cl<sub>2</sub>(OH)].

| Geometry                                                                            | State | N–O [Å] | Ru–NO<br>(Ru–ON for MS1, TS1)<br>[Å] | E <sub>rel.</sub> GS<br>[eV] |
|-------------------------------------------------------------------------------------|-------|---------|--------------------------------------|------------------------------|
| 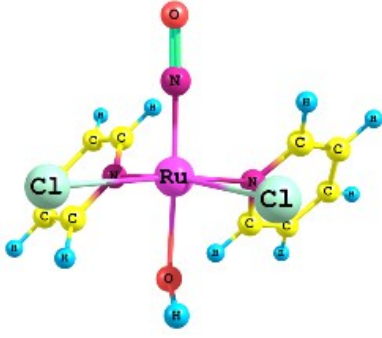   | GS    | 1.159   | 1.774                                | 0                            |
|   | MS2   | 1.188   | 1.978                                | 1.24                         |
|  | TS1   | 1.160   | 2.268                                | 2.45                         |
|  | MS1   | 1.152   | 1.883                                | 1.76                         |
